# Supplementary material for: Ploidy-Regulated Variation in Biofilm-Related Phenotypes in Natural Isolates of Saccharomyces cerevisiae
Source: PubMed Central journal article supplement (PMC4169170; doi:10.1534/g3.114.013250), 2014-07-24
Supplement: supp_g3.114.013250_013250SI.pdf [file supp_g3.114.013250_013250SI.pdf]

**Ploidy-regulated variation in biofilm-related phenotypes in natural isolates of *Saccharomyces cerevisiae***

Elyse A. Hope and Maitreya J. Dunham<sup>1</sup>

Department of Genome Sciences, University of Washington, Seattle, WA 98103

<sup>1</sup>Corresponding author: Foegen Building S403B, Box 355065, 3720 15th Ave NE, Seattle, WA 98195, USA. E-mail: [maitreya@uw.edu](mailto:maitreya@uw.edu)

DOI: 10.1534/g3.114.013250

**Table S1 *S. cerevisiae* strains included in this study**

| NAME          | GEOGRAPHICAL ORIGIN  | ECOLOGICAL ORIGIN                                                           | MATING TYPE | DIPLOID INCLUDED |
|---------------|----------------------|-----------------------------------------------------------------------------|-------------|------------------|
| DBVPG6765     | Unknown              | Unknown                                                                     | a           | yes              |
| SK1           | USA                  | Soil                                                                        | a           | yes              |
| DBVPG6044     | West Africa          | Bili wine, from<br><i>Osbeckia grandiflora</i>                              | a           | yes              |
| DBVPG1373     | Netherland           | Soil                                                                        | a           | yes              |
| DBVPG1853     | Ethiopia             | White Teff                                                                  | a           | yes              |
| Y55           | France               | Grape                                                                       | a           | yes              |
| YPS128        | Pennsylvania, USA    | Soil beneath <i>Q. alba</i>                                                 | a           | yes              |
| DBVPG1106     | Australia            | Grapes                                                                      | a           | yes              |
| DBVPG6040     | Netherland           | Fermenting fruit juice                                                      | a           | yes              |
| BC187         | Napa Valley, USA     | Barrel fermentation                                                         | a           | yes              |
| YPS606        | Pennsylvania, USA    | Bark of <i>Q. rubra</i>                                                     | a           | yes              |
| L-1374        | Chile                | Fermentation from<br>must Pais                                              | a           | yes              |
| L-1528        | Chile                | Fermentation from<br>must Cabernet                                          | a           | yes              |
| NCYC361       | Ireland              | Beer spoilage strain<br>from wort                                           | a           | yes              |
| K11           | Japan                | Shochu sake strain                                                          | a           | yes              |
| Y12           | Africa - Ivory Coast | Palm wine strain                                                            | a           | yes              |
| YS2           | Australia            | Baker strain                                                                | a           | no               |
| YS4           | Netherlands          | Baker strain                                                                | a           | no               |
| YS9           | Singapore            | Baker strain                                                                | a           | no               |
| UWOPS83-787.3 | Bahamas              | Fruit, <i>Opuntia stricta</i>                                               | a           | yes              |
| UWOPS87-2421  | Hawaii               | Cladode, <i>Opuntia<br/>megacantha</i>                                      | a           | yes              |
| UWOPS05-217.3 | Malaysia             | Nectar, Bertram palm                                                        | a           | yes              |
| UWOPS05-227.2 | Malaysia             | <i>Trigona</i> spp (Stingless<br>bee) collected near<br>Bertram palm flower | a           | yes              |
| W303          | Unknown              | N/A                                                                         | a           | no               |
| 322134S       | RVI, Newcastle, UK   | Clinical isolate (throat<br>sputum)                                         | a           | no               |
| 378604X       | RVI, Newcastle, UK   | Clinical isolate<br>(sputum)                                                | a           | no               |
| 273614N       | RVI, Newcastle, UK   | Clinical isolate (fecal)                                                    | a           | yes              |

|        |                   |                                 |   |     |
|--------|-------------------|---------------------------------|---|-----|
| YJM978 | Bergamo, Italy    | Clinical isolate<br>(vaginitis) | a | yes |
| YJM981 | Bergamo, Italy    | Clinical isolate<br>(vaginitis) | a | yes |
| YJM975 | Bergamo, Italy    | Clinical isolate<br>(vaginitis) | a | yes |
| FY4    | Laboratory strain | Laboratory strain               | a | no  |

---

**Table S2 Qualitative scoring metrics**

| <b>ASSAY</b>               | <b>SCORE</b> | <b>CRITERIA</b>                                                                                                        |
|----------------------------|--------------|------------------------------------------------------------------------------------------------------------------------|
| Complex colony morphology  | 0            | simple colonies                                                                                                        |
|                            | 1            | non-smooth colony surface                                                                                              |
|                            | 2            | signs of complex morphology                                                                                            |
|                            | 3            | moderate complex morphology (does not cover entire colony)                                                             |
|                            | 4            | strong complex morphology (covers entire colony)                                                                       |
|                            | 5            | very strong complex morphology                                                                                         |
| Complex mat formation      | 0            | simple mat                                                                                                             |
|                            | 1            | very light sectoring and/or light ruffle on edge                                                                       |
|                            | 2            | clear ruffle on edge or petals, can include sectoring                                                                  |
|                            | 3            | obvious complexity at edges                                                                                            |
|                            | 4            | obvious complexity at edges and in center                                                                              |
|                            | 5            | strong complexity across entirety of mat                                                                               |
| Diploid filamentous growth | 0            | no filaments                                                                                                           |
|                            | 1            | short filaments sparsely distributed around perimeter                                                                  |
|                            | 2            | long filaments sparsely distributed around perimeter                                                                   |
|                            | 3            | long filaments distributed around majority of perimeter<br>moderate length filaments densely distributed around entire |
|                            | 4            | perimeter                                                                                                              |
|                            | 5            | long filaments densely distributed around entire perimeter                                                             |

**File S1**

**Complete haploid phenotype dataset**

File S1 is available for download as a .pdf at <http://www.g3journal.org/lookup/suppl/doi:10.1534/g3.114.013250/-/DC1>

**Table S3 Qualitative score assignments**

| <b>STRAIN</b>     | <b>HAPLOID<br/>BIOREP1<br/>COLONY</b> | <b>HAPLOID<br/>BIOREP2<br/>COLONY</b> | <b>HAPLOID<br/>BIOREP1<br/>MAT</b> | <b>DIPLOID<br/>COLONY</b> | <b>DIPLOID<br/>MAT</b> |
|-------------------|---------------------------------------|---------------------------------------|------------------------------------|---------------------------|------------------------|
| DBVPG6765         | 0                                     | 0                                     | 0                                  | 0                         | 1                      |
| SK1               | 4                                     | 4                                     | 4                                  | 4                         | 4                      |
| DBVPG6044         | 2                                     | 2                                     | 2                                  | 1                         | 4                      |
| DBVPG1373         | 0                                     | 0                                     | 0                                  | 0                         | 3                      |
| DBVPG1853         | 1                                     | 2                                     | 0                                  | 1                         | 3                      |
| Y55               | 1                                     | 0                                     | 2                                  | 2                         | 0                      |
| YPS128            | 3                                     | 3                                     | 4                                  | 2                         | 0                      |
| DBVPG1106         | 0                                     | 0                                     | 0                                  | 0                         | 1                      |
| DBVPG6040         | 4                                     | 3                                     | 4                                  | 1                         | 2                      |
| BC187             | 2                                     | 2                                     | 5                                  | 0                         | 1                      |
| YPS606            | 3                                     | 3                                     | 5                                  | 0                         | 0                      |
| L-1374            | 3                                     | 3                                     | 4                                  | 2                         | 2                      |
| L-1528            | 4                                     | 5                                     | 5                                  | 3                         | 3                      |
| NCYC361           | 0                                     | 0                                     | 0                                  | 0                         | 3                      |
| K11               | 3                                     | 3                                     | 5                                  | 3                         | 4                      |
| Y12               | 0                                     | 0                                     | 0                                  | 0                         | 1                      |
| YS2               | 0                                     | 0                                     | 1                                  |                           |                        |
| YS4               | 1                                     | 1                                     | 3                                  |                           |                        |
| YS9               | 0                                     | 0                                     | 2                                  |                           |                        |
| UWOPS83-<br>787.3 | 1                                     | 1                                     | 0                                  | 0                         | 0                      |
| UWOPS87-<br>2421  | 1                                     | 1                                     | 0                                  | 1                         | 0                      |
| UWOPS05-<br>217.3 | 5                                     | 5                                     | 5                                  | 2                         | 4                      |
| UWOPS05-<br>227.2 | 5                                     | 5                                     | 5                                  | 1                         | 4                      |
| W303              | 0                                     | 0                                     | 2                                  |                           |                        |
| 322134S           | 5                                     |                                       | 5                                  |                           |                        |
| 378604X           | 1                                     | 1                                     | 2                                  |                           |                        |
| 273614N           | 1                                     | 1                                     | 0                                  | 0                         | 1                      |
| YJM978            | 3                                     | 2                                     | 5                                  | 0                         | 3                      |
| YJM981            | 5                                     | 5                                     | 5                                  | 3                         | 2                      |
| YJM975            | 0                                     | 0                                     | 1                                  | 2                         | 2                      |
| FY4               | 2                                     | 2                                     | 3                                  |                           |                        |

Strains are assigned qualitative scores based on the metric described in Table S2.

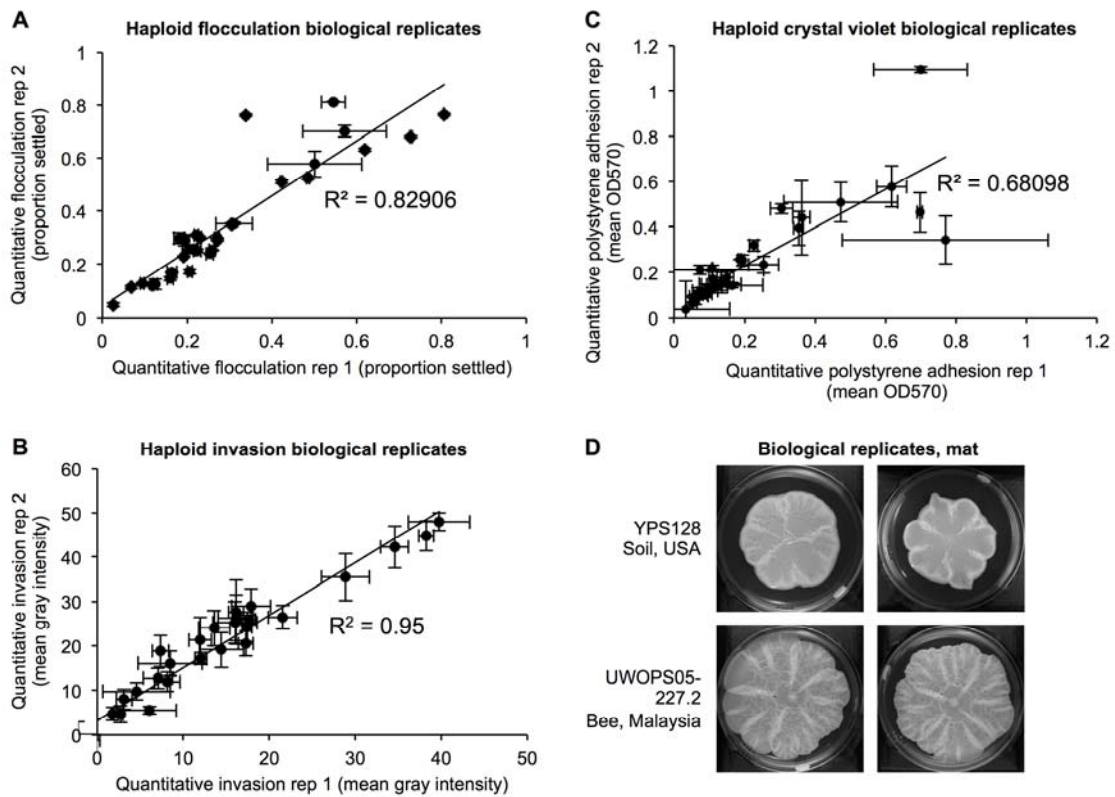

**Figure S1 Haploid biological replicates demonstrate consistency of quantitative assays** **a** Mean quantitative haploid flocculation data for one biological replicate (x-axis) is plotted against quantitative haploid flocculation data for a second biological replicate (y-axis) for correlation. Average taken and error bars calculated over three measurement replicates per strain. **b** Mean quantitative haploid invasion data for one biological replicate (x-axis) is plotted against quantitative haploid invasion data for a second biological replicate (y-axis) for correlation. Average taken and error bars calculated over three technical replicates per strain. **c** Mean quantitative haploid polystyrene adhesion data for one biological replicate (x-axis) is plotted against quantitative haploid polystyrene adhesion data for a second biological replicate (y-axis) for correlation. Average taken and error bars calculated over two technical replicates per strain. Outlier A shows the measurements from strain 322134S, and outlier B the measurements from strain SK1. Each of these strains was highly flocculent, and as a result the biofilm formed on polystyrene stained inconsistently across biological replicates and, in some cases, across technical replicates as well. If these outliers are eliminated from the analysis, the  $R^2$  value becomes 0.83. **d** Biological replicates of complex mat formation for two biological replicates of representative haploid strains. Photos taken at day 13 of growth.

**File S2**

**Complete prion-cured phenotype dataset**

File S2 is available for download as a .pdf at <http://www.g3journal.org/lookup/suppl/doi:10.1534/g3.114.013250/-/DC1>



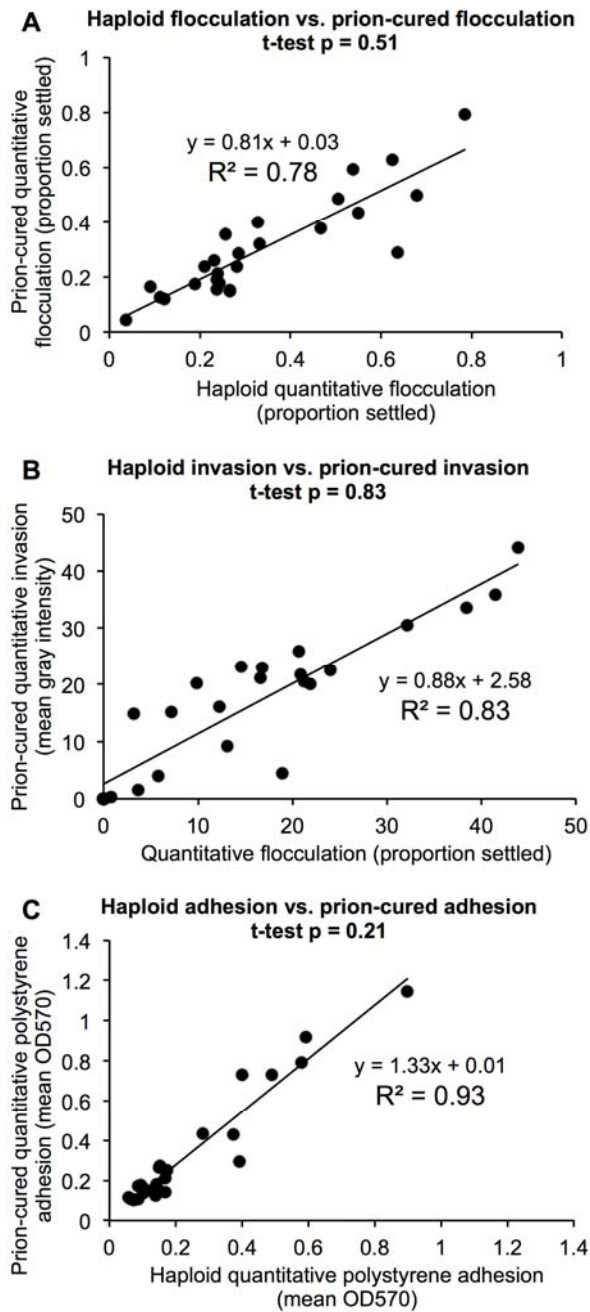

**Figure S2 Prion-cured vs. haploid correlation plots show reproducibility** **a** Mean quantitative haploid flocculation data for all biological replicates (x-axis) is plotted against quantitative prion-cured flocculation data across all cured replicates (y-axis) for correlation. P-value is shown for two-tailed t-test assuming unequal variance. **b** Mean quantitative haploid invasion data for all biological replicates (x-axis) is plotted against quantitative prion-cured invasion data across all cured replicates (y-axis) for correlation **c** Mean quantitative haploid polystyrene adhesion data for all biological replicates (x-axis) is plotted against quantitative prion-cured polystyrene adhesion data across all cured replicates (y-axis) for correlation

**File S3**

**Table of quantitative assay results**

File S3 is available for download as a tab-delimited .txt file at  
<http://www.g3journal.org/lookup/suppl/doi:10.1534/g3.114.013250/-/DC1>

**Table S4 Quantitative changes in prion-cured strains vs. haploid strains**

|                                         | <b>FLOCCULATION<sup>a</sup></b> | <b>INVASION<sup>b</sup></b> | <b>ADHESION<sup>c</sup></b> |
|-----------------------------------------|---------------------------------|-----------------------------|-----------------------------|
| Significant decrease by FDR correction* | 5                               | 1                           | 0                           |
| No change by FDR correction             | 20                              | 20                          | 23                          |
| Significant increase by FDR correction  | 1                               | 2                           | 2                           |

The numbers of prion-cured strains that showed differences when compared to the original haploid strains across three quantitative metrics are shown. Quantitative values were compared using a two-tailed t-test assuming unequal variance across all technical replicates for each strain. *P*-values were evaluated for significance using the *q*-values package from Storey with the Benjamini-Hochberg method (Storey 2002).

\* FDR = 0.05

<sup>a</sup> 26 strains

<sup>b</sup> 23 strains

<sup>c</sup> 25 strains

DBVPG6765 (YMD1152)

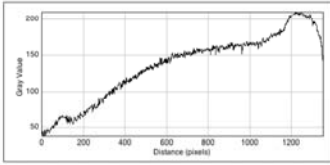

DBVPG1106 (YMD1166)

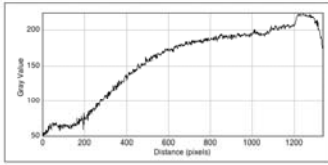

K11 (YMD1180)

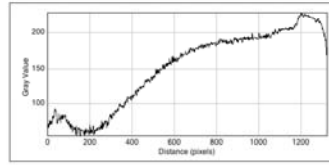

SK1 (YMD1154)

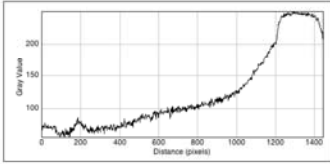

DBVPG6040 (YMD1168)

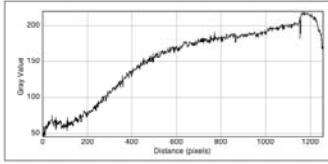

Y12 (YMD1182)

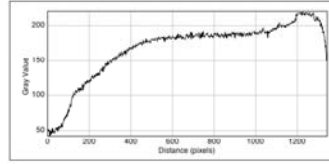

DBVPG6044 (YMD1156)

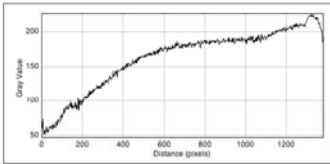

BC187 (YMD1170)

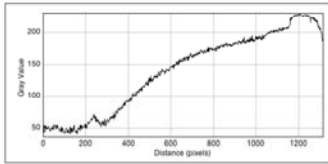

YS2 (YMD1184)

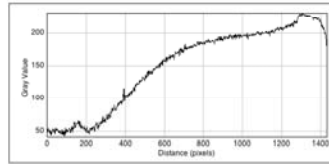

DBVPG1373 (YMD1158)

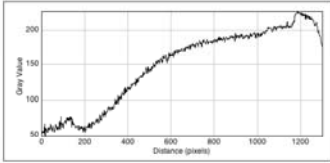

YPS606 (YMD1172)

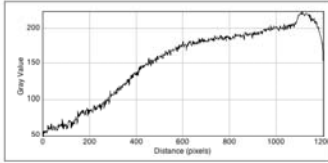

YS4 (YMD1186)

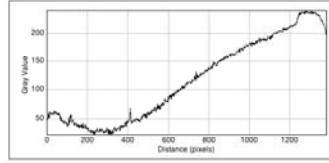

DBVPG1853 (YMD1160)

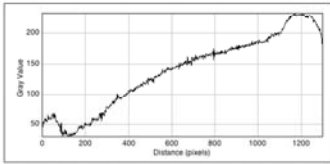

L-1374 (YMD1174)

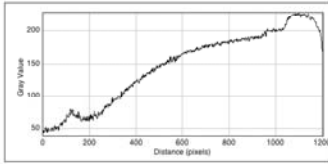

YS9 (YMD1188)

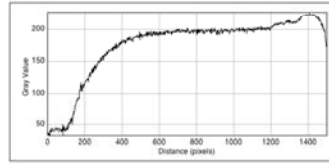

Y55 (YMD1162)

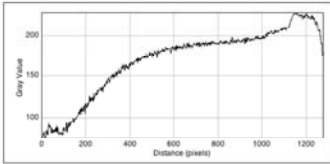

L-1528 (YMD1176)

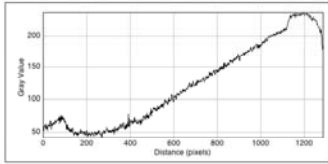

UWOPS83-787.3 (YMD1190)

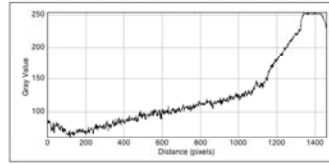

YPS128 (YMD1164)

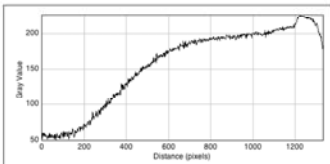

NCYC361 (YMD1178)

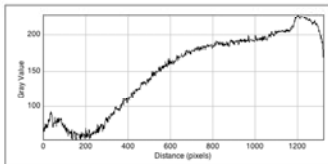

UWOPS87-242.1 (YMD1192)

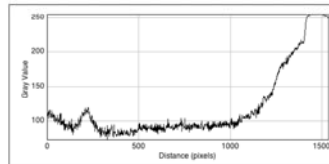

UWOPS05-217.3 (YMD1194)

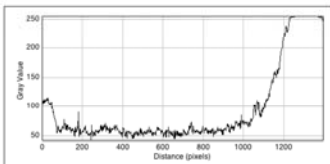

378604X (YMD1202)

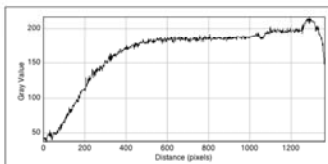

YJM975 (YMD1210)

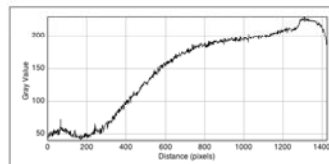

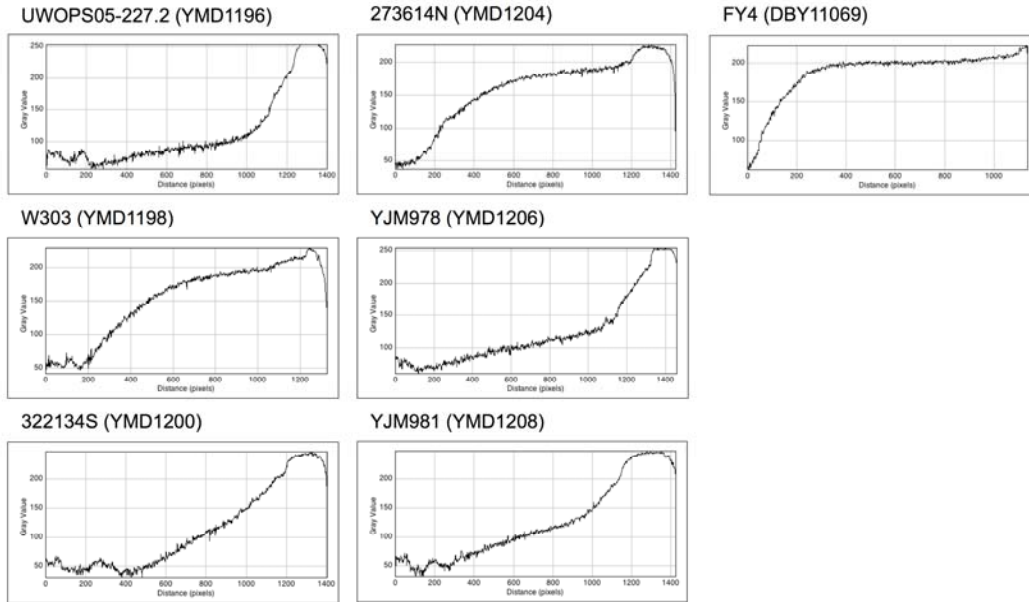

**Figure S3 Haploid settling plot profiles** A representative plot profile generated by ImageJ is shown for each strain in one biological replicate of the haploid quantitative flocculation assay. Plot profiles show mean gray value along a line drawn on the 60-minute time point settling image from the meniscus of the culture to the bottom of the tube with corresponding pixel distance values on the x-axis of the plot.

DBVPG6765 (YMD2348)

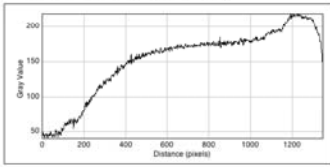

DBVPG1106 (YMD2355)

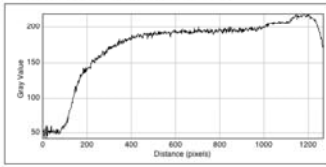

K11 (YMD2362)

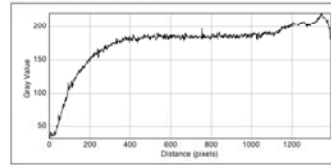

SK1 (YMD2349)

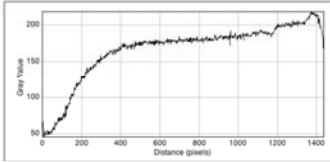

DBVPG6040 (YMD2356)

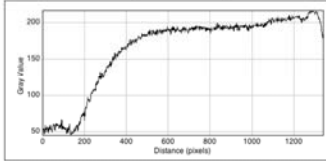

Y12 (YMD2363)

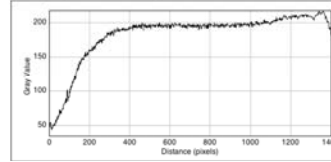

DBVPG6044 (YMD2350)

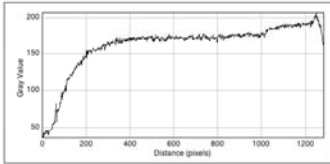

BC187 (YMD2357)

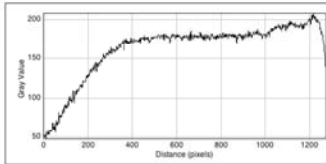

YS2 (YMD2364)

Diploid not tested

DBVPG1373 (YMD2351)

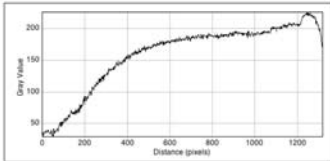

YPS606 (YMD2358)

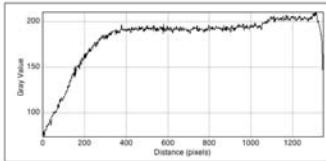

YS4 (YMD2365)

Diploid not tested

DBVPG1853 (YMD2352)

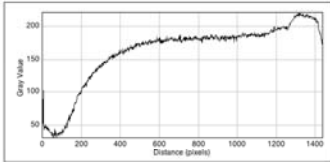

L-1374 (YMD2359)

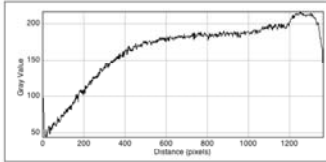

YS9 (YMD2366)

Diploid not tested

Y55 (YMD2353)

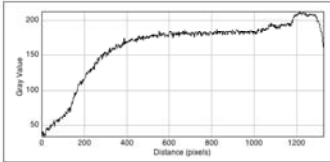

L-1528 (YMD2360)

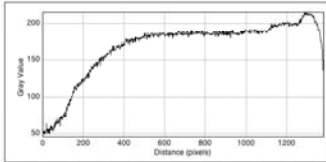

UWOPS83-787.3 (YMD2367)

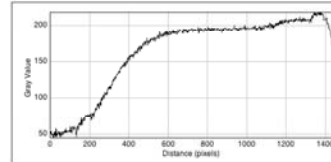

YPS128 (YMD2354)

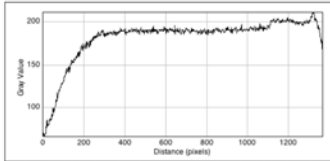

NCYC361 (YMD2361)

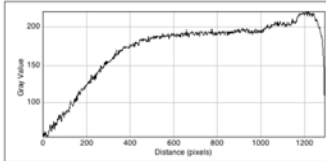

UWOPS87-242.1 (YMD2368)

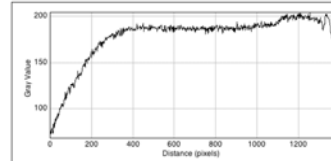

UWOPS05-217.3 (YMD2369)

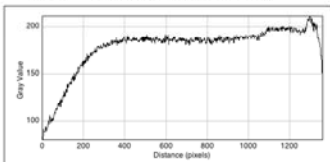

378604X (YMD2373)

Diploid not tested

YJM975 (YMD2377)

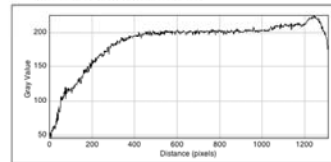

UWOPS05-227.2 (YMD2370)

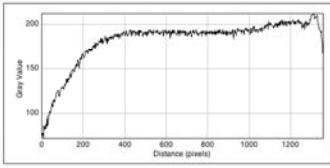

273614N (YMD2374)

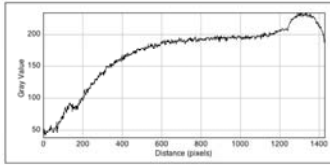

W303 (YMD2371)

Diploid not tested

YJM978 (YMD2375)

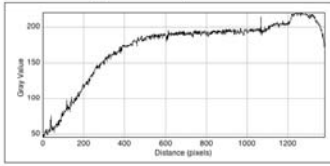

322134S (YMD2372)

Diploid not tested

YJM981 (YMD2376)

Diploid not tested

**Figure S4 Diploid settling plot profiles** A representative plot profile generated by ImageJ is shown for each strain in the diploid quantitative flocculation assay. Plot profiles show mean gray value along a line drawn on the 60-minute time point settling image from the meniscus of the culture to the bottom of the tube with corresponding pixel distance values on the x-axis of the plot.

**File S4**

**Complete diploid phenotype dataset**

File S4 is available for download as a .pdf at <http://www.g3journal.org/lookup/suppl/doi:10.1534/g3.114.013250/-/DC1>
