# Supplementary material for: Ploidy-Regulated Variation in Biofilm-Related Phenotypes in Natural Isolates of Saccharomyces cerevisiae
Source: PubMed Central journal article supplement (PMC4169170; doi:10.1534/g3.114.013250), 2014-07-24
Supplement: supp_g3.114.013250_FigureS2.pdf [file supp_g3.114.013250_FigureS2.pdf]

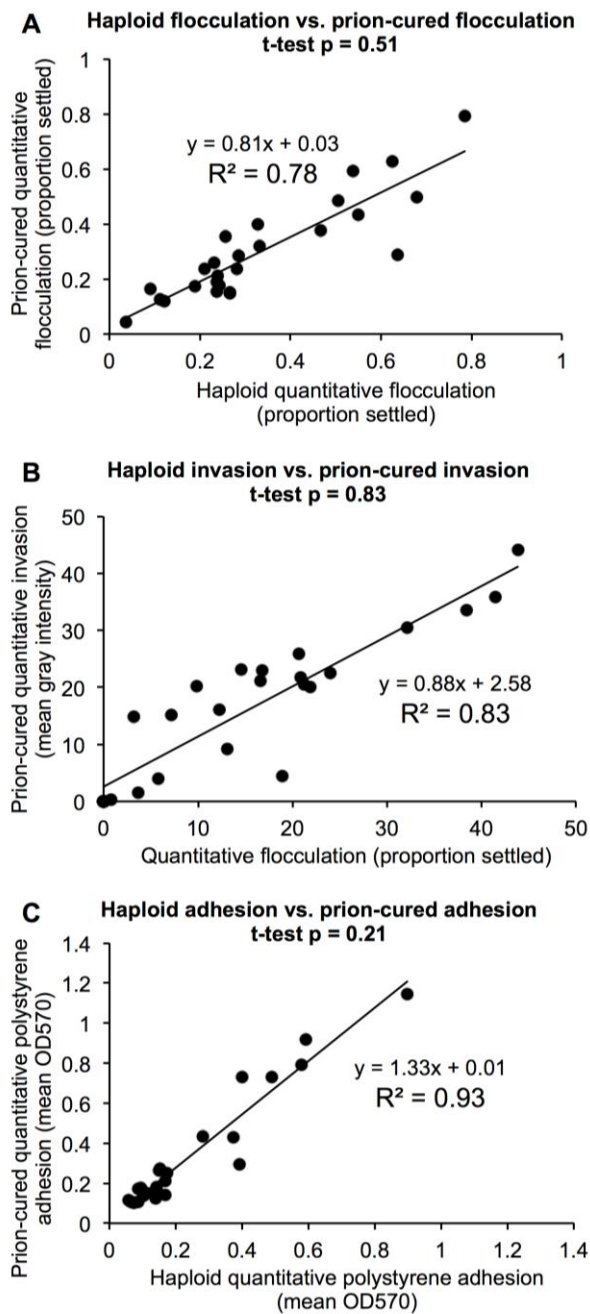

**Figure S2 Prion-cured vs. haploid correlation plots show reproducibility** **a** Mean quantitative haploid flocculation data for all biological replicates (x-axis) is plotted against quantitative prion-cured flocculation data across all cured replicates (y-axis) for correlation. P-value is shown for two-tailed t-test assuming unequal variance. **b** Mean quantitative haploid invasion data for all biological replicates (x-axis) is plotted against quantitative prion-cured invasion data across all cured replicates (y-axis) for correlation **c** Mean quantitative haploid polystyrene adhesion data for all biological replicates (x-axis) is plotted against quantitative prion-cured polystyrene adhesion data across all cured replicates (y-axis) for correlation
