# Supplementary material for: Ploidy-Regulated Variation in Biofilm-Related Phenotypes in Natural Isolates of Saccharomyces cerevisiae
Source: PubMed Central journal article supplement (PMC4169170; doi:10.1534/g3.114.013250), 2014-07-24
Supplement: supp_g3.114.013250_FileS4.pdf [file supp_g3.114.013250_FileS4.pdf]

**File S4: Diploid phenotype panel**



File S4: Diploid phenotype panel



**File S4: Diploid phenotype panel**

|                                | Colony,<br>Day 5                                                                    | Colony,<br>Day 13                                                                   | Mat<br>formation                                                                    | Settling<br>(0 min, 15 min, 30 min, 60 min)                                                                                                                                                                                                                                                                                                      | Invasion<br>(3 technical replicates)                                                                                                                                                                                                                              | Polystyrene<br>adhesion<br>(2 technical<br>reps)                                                                                                                            | Filaments                                                                             |
|--------------------------------|-------------------------------------------------------------------------------------|-------------------------------------------------------------------------------------|-------------------------------------------------------------------------------------|--------------------------------------------------------------------------------------------------------------------------------------------------------------------------------------------------------------------------------------------------------------------------------------------------------------------------------------------------|-------------------------------------------------------------------------------------------------------------------------------------------------------------------------------------------------------------------------------------------------------------------|-----------------------------------------------------------------------------------------------------------------------------------------------------------------------------|---------------------------------------------------------------------------------------|
| YS2<br>(YMD2364)               | Diploid not tested                                                                  |                                                                                     |                                                                                     |                                                                                                                                                                                                                                                                                                                                                  |                                                                                                                                                                                                                                                                   |                                                                                                                                                                             |                                                                                       |
| YS4<br>(YMD2365)               | Diploid not tested                                                                  |                                                                                     |                                                                                     |                                                                                                                                                                                                                                                                                                                                                  |                                                                                                                                                                                                                                                                   |                                                                                                                                                                             |                                                                                       |
| YS9<br>(YMD2366)               | Diploid not tested                                                                  |                                                                                     |                                                                                     |                                                                                                                                                                                                                                                                                                                                                  |                                                                                                                                                                                                                                                                   |                                                                                                                                                                             |                                                                                       |
| UWOPS83-<br>787.3<br>(YMD2367) |    |    |    |             |          |       |    |
| UWOPS87-<br>242.1<br>(YMD2368) |    |    |    |             |          |       |    |
| UWOPS05-<br>217.3<br>(YMD2369) |   |   |   |         |       |     |   |
| UWOPS05-<br>227.2<br>(YMD2370) |  |  |  |     |    |   |  |
| W303<br>(YMD2371)              | Diploid not tested                                                                  |                                                                                     |                                                                                     |                                                                                                                                                                                                                                                                                                                                                  |                                                                                                                                                                                                                                                                   |                                                                                                                                                                             |                                                                                       |

**File S4: Diploid phenotype panel**

|                      | Colony,<br>Day 5                                                                   | Colony,<br>Day 13                                                                  | Mat<br>formation                                                                   | Settling<br>(0 min, 15 min, 30 min, 60 min)                                         | Invasion<br>(3 technical replicates)                                                 | Polystyrene<br>adhesion<br>(2 technical<br>reps)                                     | Filaments                                                                            |
|----------------------|------------------------------------------------------------------------------------|------------------------------------------------------------------------------------|------------------------------------------------------------------------------------|-------------------------------------------------------------------------------------|--------------------------------------------------------------------------------------|--------------------------------------------------------------------------------------|--------------------------------------------------------------------------------------|
| 322134S<br>(YMD2372) | Diploid not tested                                                                 |                                                                                    |                                                                                    |                                                                                     |                                                                                      |                                                                                      |                                                                                      |
| 378604X<br>(YMD2373) | Diploid not tested                                                                 |                                                                                    |                                                                                    |                                                                                     |                                                                                      |                                                                                      |                                                                                      |
| 273614N<br>(YMD2374) |   |   |   |   |   |   |   |
| YJM978<br>(YMD2375)  |   |   |   |   |   |   |   |
| YJM981<br>(YMD2376)  |   |   |   |   |   |   |   |
| YJM975<br>(YMD2377)  |  |  |  |  |  |  |  |

**File S4 Complete diploid phenotypic panel** Full phenotypic panel for all 24 diploid strains used in study. Strains are listed with their formal name and origin and are shown across six different phenotypes. Three technical replicates are shown for the invasion assay, photographed after 24 hours' growth following washing on day 5. Two technical replicates are shown for the polystyrene adhesion assay. Pictured biofilms are fixed and stained with a 1% w/v crystal violet solution.
