# Supplementary material for: Ploidy-Regulated Variation in Biofilm-Related Phenotypes in Natural Isolates of Saccharomyces cerevisiae
Source: PubMed Central journal article supplement (PMC4169170; doi:10.1534/g3.114.013250), 2014-07-24
Supplement: supp_g3.114.013250_TableS1.pdf [file supp_g3.114.013250_TableS1.pdf]

**Table S1 *S. cerevisiae* strains included in this study**

| NAME          | GEOGRAPHICAL ORIGIN  | ECOLOGICAL ORIGIN                                                           | MATING TYPE | DIPLOID INCLUDED |
|---------------|----------------------|-----------------------------------------------------------------------------|-------------|------------------|
| DBVPG6765     | Unknown              | Unknown                                                                     | a           | yes              |
| SK1           | USA                  | Soil                                                                        | a           | yes              |
| DBVPG6044     | West Africa          | Bili wine, from<br><i>Osbeckia grandiflora</i>                              | a           | yes              |
| DBVPG1373     | Netherland           | Soil                                                                        | a           | yes              |
| DBVPG1853     | Ethiopia             | White Teff                                                                  | a           | yes              |
| Y55           | France               | Grape                                                                       | a           | yes              |
| YPS128        | Pennsylvania, USA    | Soil beneath <i>Q. alba</i>                                                 | a           | yes              |
| DBVPG1106     | Australia            | Grapes                                                                      | a           | yes              |
| DBVPG6040     | Netherland           | Fermenting fruit juice                                                      | a           | yes              |
| BC187         | Napa Valley, USA     | Barrel fermentation                                                         | a           | yes              |
| YPS606        | Pennsylvania, USA    | Bark of <i>Q. rubra</i>                                                     | a           | yes              |
| L-1374        | Chile                | Fermentation from<br>must Pais                                              | a           | yes              |
| L-1528        | Chile                | Fermentation from<br>must Cabernet                                          | a           | yes              |
| NCYC361       | Ireland              | Beer spoilage strain<br>from wort                                           | a           | yes              |
| K11           | Japan                | Shochu sake strain                                                          | a           | yes              |
| Y12           | Africa - Ivory Coast | Palm wine strain                                                            | a           | yes              |
| YS2           | Australia            | Baker strain                                                                | a           | no               |
| YS4           | Netherlands          | Baker strain                                                                | a           | no               |
| YS9           | Singapore            | Baker strain                                                                | a           | no               |
| UWOPS83-787.3 | Bahamas              | Fruit, <i>Opuntia stricta</i>                                               | a           | yes              |
| UWOPS87-2421  | Hawaii               | Cladode, <i>Opuntia<br/>megacantha</i>                                      | a           | yes              |
| UWOPS05-217.3 | Malaysia             | Nectar, Bertram palm                                                        | a           | yes              |
| UWOPS05-227.2 | Malaysia             | <i>Trigona</i> spp (Stingless<br>bee) collected near<br>Bertram palm flower | a           | yes              |
| W303          | Unknown              | N/A                                                                         | a           | no               |
| 322134S       | RVI, Newcastle, UK   | Clinical isolate (throat<br>sputum)                                         | a           | no               |
| 378604X       | RVI, Newcastle, UK   | Clinical isolate<br>(sputum)                                                | a           | no               |
| 273614N       | RVI, Newcastle, UK   | Clinical isolate (fecal)                                                    | a           | yes              |

|        |                   |                                 |   |     |
|--------|-------------------|---------------------------------|---|-----|
| YJM978 | Bergamo, Italy    | Clinical isolate<br>(vaginitis) | a | yes |
| YJM981 | Bergamo, Italy    | Clinical isolate<br>(vaginitis) | a | yes |
| YJM975 | Bergamo, Italy    | Clinical isolate<br>(vaginitis) | a | yes |
| FY4    | Laboratory strain | Laboratory strain               | a | no  |

---
