# Supplementary material for: Ploidy-Regulated Variation in Biofilm-Related Phenotypes in Natural Isolates of Saccharomyces cerevisiae
Source: PubMed Central journal article supplement (PMC4169170; doi:10.1534/g3.114.013250), 2014-07-24
Supplement: supp_g3.114.013250_TableS2.pdf [file supp_g3.114.013250_TableS2.pdf]

**Table S2 Qualitative scoring metrics**

| <b>ASSAY</b>               | <b>SCORE</b> | <b>CRITERIA</b>                                                                                                        |
|----------------------------|--------------|------------------------------------------------------------------------------------------------------------------------|
| Complex colony morphology  | 0            | simple colonies                                                                                                        |
|                            | 1            | non-smooth colony surface                                                                                              |
|                            | 2            | signs of complex morphology                                                                                            |
|                            | 3            | moderate complex morphology (does not cover entire colony)                                                             |
|                            | 4            | strong complex morphology (covers entire colony)                                                                       |
|                            | 5            | very strong complex morphology                                                                                         |
| Complex mat formation      | 0            | simple mat                                                                                                             |
|                            | 1            | very light sectoring and/or light ruffle on edge                                                                       |
|                            | 2            | clear ruffle on edge or petals, can include sectoring                                                                  |
|                            | 3            | obvious complexity at edges                                                                                            |
|                            | 4            | obvious complexity at edges and in center                                                                              |
|                            | 5            | strong complexity across entirety of mat                                                                               |
| Diploid filamentous growth | 0            | no filaments                                                                                                           |
|                            | 1            | short filaments sparsely distributed around perimeter                                                                  |
|                            | 2            | long filaments sparsely distributed around perimeter                                                                   |
|                            | 3            | long filaments distributed around majority of perimeter<br>moderate length filaments densely distributed around entire |
|                            | 4            | perimeter                                                                                                              |
|                            | 5            | long filaments densely distributed around entire perimeter                                                             |
