# Supplementary material for: Ploidy-Regulated Variation in Biofilm-Related Phenotypes in Natural Isolates of Saccharomyces cerevisiae
Source: PubMed Central journal article supplement (PMC4169170; doi:10.1534/g3.114.013250), 2014-07-24
Supplement: supp_g3.114.013250_TableS3.pdf [file supp_g3.114.013250_TableS3.pdf]

**Table S3 Qualitative score assignments**

| <b>STRAIN</b>     | <b>HAPLOID<br/>BIOREP1<br/>COLONY</b> | <b>HAPLOID<br/>BIOREP2<br/>COLONY</b> | <b>HAPLOID<br/>BIOREP1<br/>MAT</b> | <b>DIPLOID<br/>COLONY</b> | <b>DIPLOID<br/>MAT</b> |
|-------------------|---------------------------------------|---------------------------------------|------------------------------------|---------------------------|------------------------|
| DBVPG6765         | 0                                     | 0                                     | 0                                  | 0                         | 1                      |
| SK1               | 4                                     | 4                                     | 4                                  | 4                         | 4                      |
| DBVPG6044         | 2                                     | 2                                     | 2                                  | 1                         | 4                      |
| DBVPG1373         | 0                                     | 0                                     | 0                                  | 0                         | 3                      |
| DBVPG1853         | 1                                     | 2                                     | 0                                  | 1                         | 3                      |
| Y55               | 1                                     | 0                                     | 2                                  | 2                         | 0                      |
| YPS128            | 3                                     | 3                                     | 4                                  | 2                         | 0                      |
| DBVPG1106         | 0                                     | 0                                     | 0                                  | 0                         | 1                      |
| DBVPG6040         | 4                                     | 3                                     | 4                                  | 1                         | 2                      |
| BC187             | 2                                     | 2                                     | 5                                  | 0                         | 1                      |
| YPS606            | 3                                     | 3                                     | 5                                  | 0                         | 0                      |
| L-1374            | 3                                     | 3                                     | 4                                  | 2                         | 2                      |
| L-1528            | 4                                     | 5                                     | 5                                  | 3                         | 3                      |
| NCYC361           | 0                                     | 0                                     | 0                                  | 0                         | 3                      |
| K11               | 3                                     | 3                                     | 5                                  | 3                         | 4                      |
| Y12               | 0                                     | 0                                     | 0                                  | 0                         | 1                      |
| YS2               | 0                                     | 0                                     | 1                                  |                           |                        |
| YS4               | 1                                     | 1                                     | 3                                  |                           |                        |
| YS9               | 0                                     | 0                                     | 2                                  |                           |                        |
| UWOPS83-<br>787.3 | 1                                     | 1                                     | 0                                  | 0                         | 0                      |
| UWOPS87-<br>2421  | 1                                     | 1                                     | 0                                  | 1                         | 0                      |
| UWOPS05-<br>217.3 | 5                                     | 5                                     | 5                                  | 2                         | 4                      |
| UWOPS05-<br>227.2 | 5                                     | 5                                     | 5                                  | 1                         | 4                      |
| W303              | 0                                     | 0                                     | 2                                  |                           |                        |
| 322134S           | 5                                     |                                       | 5                                  |                           |                        |
| 378604X           | 1                                     | 1                                     | 2                                  |                           |                        |
| 273614N           | 1                                     | 1                                     | 0                                  | 0                         | 1                      |
| YJM978            | 3                                     | 2                                     | 5                                  | 0                         | 3                      |
| YJM981            | 5                                     | 5                                     | 5                                  | 3                         | 2                      |
| YJM975            | 0                                     | 0                                     | 1                                  | 2                         | 2                      |
| FY4               | 2                                     | 2                                     | 3                                  |                           |                        |

Strains are assigned qualitative scores based on the metric described in Table S2.
