# Supplementary material for: Ploidy-Regulated Variation in Biofilm-Related Phenotypes in Natural Isolates of Saccharomyces cerevisiae
Source: PubMed Central journal article supplement (PMC4169170; doi:10.1534/g3.114.013250), 2014-07-24
Supplement: supp_g3.114.013250_TableS4.pdf [file supp_g3.114.013250_TableS4.pdf]

**Table S4 Quantitative changes in prion-cured strains vs. haploid strains**

|                                         | <b>FLOCCULATION<sup>a</sup></b> | <b>INVASION<sup>b</sup></b> | <b>ADHESION<sup>c</sup></b> |
|-----------------------------------------|---------------------------------|-----------------------------|-----------------------------|
| Significant decrease by FDR correction* | 5                               | 1                           | 0                           |
| No change by FDR correction             | 20                              | 20                          | 23                          |
| Significant increase by FDR correction  | 1                               | 2                           | 2                           |

The numbers of prion-cured strains that showed differences when compared to the original haploid strains across three quantitative metrics are shown. Quantitative values were compared using a two-tailed t-test assuming unequal variance across all technical replicates for each strain. *P*-values were evaluated for significance using the *q*-values package from Storey with the Benjamini-Hochberg method (Storey 2002).

\* FDR = 0.05

<sup>a</sup> 26 strains

<sup>b</sup> 23 strains

<sup>c</sup> 25 strains
